# Supplementary material
Source: MDPI journal article supplement (https://www.mdpi.com/2073-4395/12/6/1457)
Supplement: s1 [file s1]

## Supplementary material

**Table S1.** Names of genotypes and their respective pedigrees used in this study.

| ENTRY                                               | PEDIGREE                                                                          |
|-----------------------------------------------------|-----------------------------------------------------------------------------------|
| Genotypes from CIMMYT Heat Stress Tolerance Nursery |                                                                                   |
| BW28                                                | CMSA05Y01011T-040M-040ZTP0Y-040ZTM-040SY-14ZTM-03Y-0B                             |
| BW48                                                | CMSA04M00346S-040ZTP0Y-040ZTM-040SY-27ZTM-04Y-0B                                  |
| BW49                                                | CMSA04M00346S-040ZTP0Y-040ZTM-040SY-28ZTM-01Y-0B                                  |
| BW58                                                | CMSA04M00067S-040ZTB-040ZTY-040ZTM-040SY-2ZTM-02Y-0B                              |
| BW63                                                | CMSA04M01020T-050Y-040ZTP0M-040ZTY-040ZTM-040SY-5ZTM-03Y-0B                       |
| BW71                                                | CMSA05Y00325S-040ZTP0Y-040ZTM-040SY-7ZTM-01Y-0B                                   |
| BW103                                               | CMSS05B00581S-099Y-099M-099Y-099ZTM-2WGY-0B                                       |
| BW111                                               | CMSS05B00663S-099Y-099M-099Y-099ZTM-13WGY-0B                                      |
| BW116                                               | CMSS05B00742S-099Y-099M-099Y-099ZTM-5WGY-0B                                       |
| BW124                                               | CGSS05B00153T-099TOPY-099M-099NJ-22WGY-0B                                         |
| BW127                                               | CGSS05B00162T-099TOPY-099M-099Y-099ZTM-15WGY-0B                                   |
| BW128                                               | CGSS05B00162T-099TOPY-099M-099NJ-13WGY-0B                                         |
| BW129                                               | CGSS05B00162T-099TOPY-099M-099NJ-099NJ-7WGY-0B                                    |
| BW141                                               | CGSS05B00243T-099TOPY-099M-099NJ-099NJ-1WGY-0B                                    |
| BW142                                               | CGSS05B00243T-099TOPY-099M-099NJ-099NJ-2WGY-0B                                    |
| BW145                                               | CGSS05B00253T-099TOPY-099M-099Y-099ZTM-8WGY-0B                                    |
| BW147                                               | CGSS05B00256T-099TOPY-099M-099NJ-099NJ-5WGY-0B                                    |
| BW148                                               | CGSS05B00258T-099TOPY-099M-099Y-099ZTM-3WGY-0B                                    |
| BW149                                               | CGSS05B00258T-099TOPY-099M-099Y-099ZTM-11WGY-0B                                   |
| BW150                                               | CGSS05B00258T-099TOPY-099M-099Y-099ZTM-12WGY-0B                                   |
| BW151                                               | CGSS05B00258T-099TOPY-099M-099Y-099ZTM-13WGY-0B                                   |
| BW152                                               | CGSS05B00258T-099TOPY-099M-099NJ-1WGY-0B                                          |
| BW157                                               | CGSS05B00261T-099TOPY-099M-099NJ-099NJ-8WGY-0B                                    |
| BW157                                               | CGSS05B00261T-099TOPY-099M-099NJ-099NJ-8WGY-0B                                    |
| BW159                                               | CGSS05B00290T-099TOPY-099M-099NJ-099NJ-7WGY-0B                                    |
| BW162                                               | CGSS05B00304T-099TOPY-099M-099NJ-099NJ-3WGY-0B                                    |
| LM01                                                | ACHTAR*3//KANZ/KS85-8-5/4/MILAN/KAUZ//PRINIA/3/BAV92/5/MILAN/KAUZ//PRINIA/3/BAV92 |
| LM12                                                | SOKOLL/ROLF07                                                                     |
| LM14                                                | MILAN/KAUZ//PRINIA/3/BAV92/4/WBLL1*2/KUKUNA                                       |
| LM15                                                | RL6043/4*NAC//PASTOR/3/BAV92/4/ATTILA/BAV92//PASTOR                               |
| LM16                                                | PASTOR*2/BAV92/3/FRET2/KUKUNA//FRET2                                              |
| LM17                                                | ESDA/KKTS                                                                         |
| LM18                                                | GOUBARA-1/2*SOKOLL                                                                |
| LM19                                                | SOKOLL*2/4/CHEN/AEGILOPS SQUARROSA (TAUS)//FCT/3/STAR                             |
| LM20                                                | PBW343                                                                            |
| LM21                                                | PRL/2*PASTOR                                                                      |
| LM22                                                | MUNAL #1                                                                          |

**Table S1.** Continued.

| ENTRY                                               | PEDIGREE                    |
|-----------------------------------------------------|-----------------------------|
| Genotypes from CIMMYT Heat Stress Tolerance Nursery |                             |
| LM23                                                | QUAIU                       |
| LM24                                                | WBLL1*2/BRAMBLING           |
| LM25                                                | WHEAR//2*PRL/2*PASTOR       |
| LM26                                                | ATTILA*2/PBW65//TAM200/TUI  |
| LM27                                                | YUNMAI 48//2*WBLL1*2/KURUKU |

|      |                                                                                                                        |
|------|------------------------------------------------------------------------------------------------------------------------|
| LM28 | ATTILA/3*BCN//BAV92/3/TILHI/4/SHA7/VEE#5//ARIV92                                                                       |
| LM29 | PRL/2*PASTOR*2//SKAUZ/BAV92                                                                                            |
| LM30 | C80.1/3*BATAVIA//2*WBLL1/3/ATTILA/3*BCN*2//BAV92/4/WBLL1*2/KURUKU                                                      |
| LM31 | ATTILA*2/HUITES//FINSI/3/ATTILA*2/PBW65                                                                                |
| LM32 | ATTILA*2//CHIL/BUC*2/3/KUKUNA                                                                                          |
| LM33 | ATTILA*2/PBW65//KACHU                                                                                                  |
| LM35 | WBLL1//UP2338*2/VIVITSI                                                                                                |
| LM36 | WBLL1*2/4/SNI/TRAP#1/3/KAUZ*2/TRAP//KAUZ/5/KACHU                                                                       |
| LM37 | KACHU/SAUAL                                                                                                            |
| LM38 | SAUAL/3/MILAN/S87230//BAV92                                                                                            |
| LM39 | ATTILA/3*BCN//BAV92/3/TILHI/5/BAV92/3/PRL/SARA//TSI/VEE#5/4/CROC_1/AE.SQU ARROSA (224)//2*OPATA                        |
| LM40 | WBLL1*2/VIVITSI/6/CNDO/R143//ENTE/MEXI_2/3/AEGILOPS SQUARROSA (TAUS)/4/WEAVER/5/2*JANZ                                 |
| LM41 | C80.1/3*BATAVIA//2*WBLL1/5/REH/HARE//2*BCN/3/CROC_1/AE.SQUARROSA (213)//PGO/4/HUITES                                   |
| LM42 | TRCH/5/REH/HARE//2*BCN/3/CROC_1/AE.SQUARROSA (213)//PGO/4/HUITES                                                       |
| LM43 | ROLF07*2/6/PVN//CAR422/ANA/5/BOW/CROW//BUC/PVN/3/YR/4/TRAP#1                                                           |
| LM44 | ROLF07/TUKURU/5/WBLL1*2/4/YACO/PBW65/3/KAUZ*2/TRAP//KAUZ                                                               |
| LM46 | FRET2/KUKUNA//FRET2/3/PARUS/5/FRET2*2/4/SNI/TRAP#1/3/KAUZ*2/TRAP//KAUZ                                                 |
| LM47 | FRET2/KUKUNA//FRET2/3/YANAC/4/FRET2/KIRITATI                                                                           |
| LM48 | FRET2/KUKUNA//FRET2/3/PASTOR//HXL7573/2*BAU/5/FRET2*2/4/SNI/TRAP#1/3/KAUZ*2/TRAP//KAUZ                                 |
| LM49 | TRCH/SRTU//KACHU                                                                                                       |
| LM50 | HUW234+LR34/PRINIA*2//SNLG                                                                                             |
| LM51 | HUW234+LR34/PRINIA*2//YANAC                                                                                            |
| LM52 | HUW234+LR34/PRINIA*2//WHEAR                                                                                            |
| LM54 | PBW343*2/KUKUNA*2//KITE                                                                                                |
| LM55 | PBW343*2/KUKUNA//PARUS/3/PBW343*2/KUKUNA                                                                               |
| LM56 | PBW343*2/KUKUNA*2//YANAC                                                                                               |
| LM57 | PBW343*2/KUKUNA//SRTU/3/PBW343*2/KHVAKI                                                                                |
| LM58 | ATTILA*2/PBW65/6/PVN//CAR422/ANA/5/BOW/CROW//BUC/PVN/3/YR/4/TRAP#1/7/ATTILA/2*PASTOR                                   |
| LM59 | FRET2/KUKUNA//FRET2/3/WHEAR/4/FRET2/TUKURU//FRET2                                                                      |
| LM60 | ALD/CEP75630//CEP75234/PT7219/3/BUC/BJY/4/CBRD/5/TNMU/PF85487/6/PBW343*2/KU-KUNA/7/CNO79//PF70354/MUS/3/PASTOR/4/BAV92 |

**Table S1.** Continued.

| ENTRY                                                  | PEDIGREE                                                              |
|--------------------------------------------------------|-----------------------------------------------------------------------|
| Genotypes from CIMMYT Drought Stress Tolerance Nursery |                                                                       |
| LM71                                                   | BABAX/3/PRL/SARA//TSI/VEE#5/4/CROC_1/AE.SQUARROSA (224)//2*OPATA      |
| LM72                                                   | BABAX/3/PRL/SARA//TSI/VEE#5/4/WBLL1                                   |
| LM75                                                   | BUC/MN72253//PASTOR                                                   |
| LM76                                                   | MILAN/KAUZ//PRINIA/3/BABAX                                            |
| LM77                                                   | CNDO/R143//ENTE/MEXI_2/3/AEGILOPS SQUARROSA (TAUS)/4/WEAVER/5/2*FRAME |
| LM79                                                   | CROC_1/AE.SQUARROSA (205)//BORL95/3/KENNEDY                           |
| LM80                                                   | CROC_1/AE.SQUARROSA (205)//KAUZ/3/SLVS                                |
| LM81                                                   | CROC_1/AE.SQUARROSA (224)//2*OPATA/3/2*RAC655                         |
| LM82                                                   | HD30/5/CNDO/R143//ENTE/MEXI75/3/AE.SQ/4/2*OCI                         |
| LM83                                                   | PASTOR/3/VEE#5//DOVE/BUC                                              |
| LM84                                                   | SRN/AE.SQUARROSA (358)//MILAN/SHA7                                    |
| LM85                                                   | SW94.60002/4/KAUZ*2//DOVE/BUC/3/KAUZ/5/SW91-12331                     |

|               |                                                          |
|---------------|----------------------------------------------------------|
| <b>LM86</b>   | CHAM 6                                                   |
| <b>LM90</b>   | CROC_1/AE.SQUARROSA (205)//BORL95/3/KENNEDY-2            |
| <b>LM91</b>   | FRTL/CMH83.2517                                          |
| <b>LM93</b>   | PASTOR/FLORKWA.1//PASTOR                                 |
| <b>LM96</b>   | ALTAR 84/AE.SQ//2*OPATA/3/PIFED                          |
| <b>LM97</b>   | KRICHAUFF/2*PASTOR                                       |
| <b>LM98</b>   | KABY//2*ALUBUC/BAYA                                      |
| <b>ENTRY</b>  | PEDIGREE                                                 |
| <b>LM99</b>   | ALTAR 84/AEGILOPS SQUARROSA (TAUS)//OCI/3/VEE/MJI//2*TUI |
| <b>LM100</b>  | SW89.5277/BORL95//SKAUZ                                  |
| <b>Checks</b> |                                                          |
| <b>LM70</b>   | Check                                                    |
| <b>BW80</b>   | Check                                                    |
| <b>BW100</b>  | Check                                                    |
| <b>BW120</b>  | Check                                                    |
| <b>BW140</b>  | Check                                                    |
